# Supplementary material for: Simultaneously enhancing the in vitro/in vivo performances of acetazolamide using proline as a zwitterionic coformer for cocrystallization
Source: Royal Society of Chemistry journal article supplement (doi:10.1039/c9ce00270g), 2019-01-01
Supplement: c9ce00270g1.pdf [file c9ce00270g1.pdf]

## Electronic Supplementary Information (ESI)

### Contents

**Figure S1.** FT-IR spectra of cocrystal ACA-PRO compared with its starting materials.

**Figure S2.** XRPD patterns of the undissolved solids after powder solubility experiments in different buffers.

**Figure S3.** IDR profiles of ACA and cocrystal ACA-PRO.

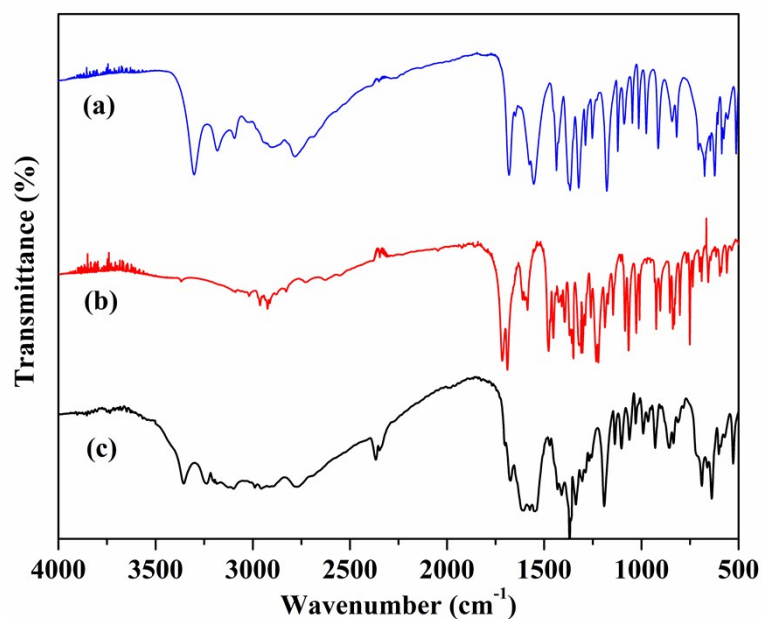

**Figure S1.** FT-IR spectra of (a) ACA, (b) PRO, and (c) ACA-PRO.

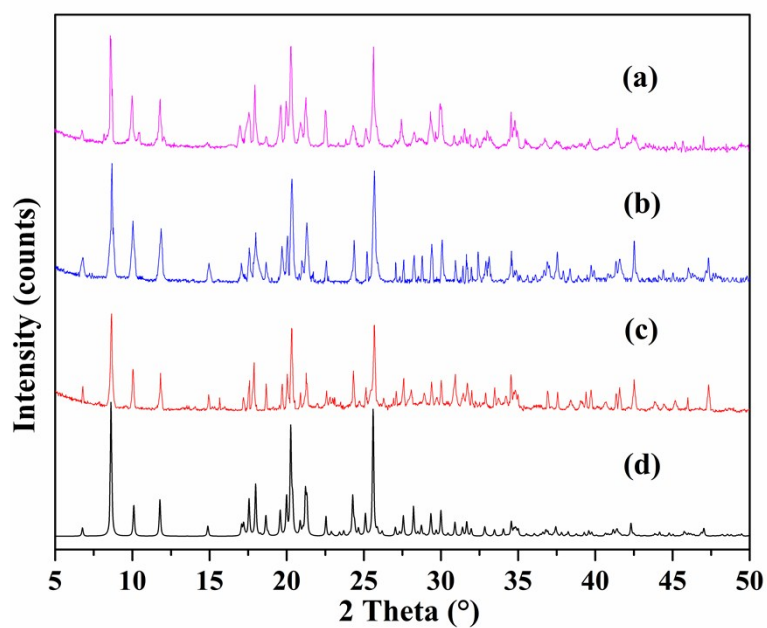

**Figure S2.** XRPD patterns of the undissolved solids after powder solubility experiments in different buffers for 5 h: (a) at pH = 1.2, (b) at pH = 4.0, and (c) at pH = 6.8, and (d) simulated pattern for ACA-PRO.

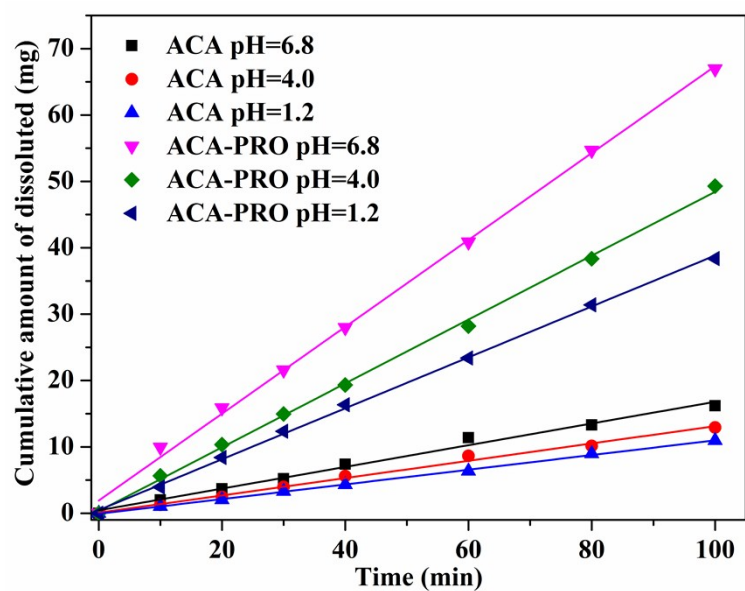

**Figure S3.** IDR profiles of ACA and ACA-PRO at pH 1.2, 4.0, and 6.8.
